# Supplementary material for: Characterization of Genetic Diversity and Linkage Disequilibrium of ZmLOX4 and ZmLOX5 Loci in Maize
Source: PLoS One. 2013 Jan 24;8(1):e53973. doi: 10.1371/journal.pone.0053973 (PMC3554709; doi:10.1371/journal.pone.0053973)
Supplement: Table S1 — SNP genotypes for the 260 lines successfully sequenced for ZmLOX4 and their respective position on chromosome 1 based on the B73 reference genome (B73 RefGen_V2). (XLSX) [file pone.0053973.s001.xlsx]

## Sheet: Sheet1
Genotype	Collection	Position Based on B73 RefGen_V2
		264224287	264224380	264224403	264224414	264224594	264224645	264224831	264224915	264224941	264224950
CM37	Flint Garcia et al. 300	T	A	G	T	C	C	C	C	-	C
CM7	Flint Garcia et al. 300	T	A	G	T	T	C	C	C	-	C
CO255	Flint Garcia et al. 300	T	A	A	G	T	C	T	C	-	C
CMV3	Flint Garcia et al. 300	T	G	G	A	C	C	C	C	-	T
CO106	Flint Garcia et al. 300	T	G	G	A	C	C	C	C	-	T
Mt42	Flint Garcia et al. 300	T	G	G	A	C	C	C	C	-	T
EP1	Flint Garcia et al. 300	T	A	A	G	C	C	C	C	-	C
W182B	Flint Garcia et al. 300	T	G	G	A	C	C	C	C	-	T
ND246	Flint Garcia et al. 300	T	A	G	T	T	C	C	C	-	C
A188	Flint Garcia et al. 300	T	A	G	T	T	C	C	C	-	C
W117HT	Flint Garcia et al. 300	T	G	G	A	C	C	T	C	-	T
CO125	Flint Garcia et al. 300	T	A	A	G	C	C	C	C	-	C
MS1334	Flint Garcia et al. 300	T	A	G	T	T	C	C	C	-	C
W401	Flint Garcia et al. 300	T	G	G	A	C	C	C	C	-	C
P39 Goodman-Buckler	Flint Garcia et al. 300	T	A	G	T	T	C	C	C	-	C
A654	Flint Garcia et al. 300	T	G	G	A	C	C	C	C	-	T
Il 101T	Flint Garcia et al. 300	T	A	G	T	T	C	C	C	-	C
A661	Flint Garcia et al. 300	T	A	G	T	T	C	C	C	-	C
B164	Flint Garcia et al. 300	T	G	G	A	C	C	C	C	-	T
SD44	Flint Garcia et al. 300	T	G	G	A	C	C	C	C	-	T
A641	Flint Garcia et al. 300	T	A	G	T	T	C	C	C	-	C
W153R	Flint Garcia et al. 300	T	G	G	A	C	C	C	C	-	T
I29	Flint Garcia et al. 300	T	A	G	T	T	C	C	C	-	C
Il14H	Flint Garcia et al. 300	T	G	G	A	C	C	C	C	-	T
N6	Flint Garcia et al. 300	T	G	G	A	C	C	C	C	-	T
Mo47	Flint Garcia et al. 300	T	G	G	A	C	C	C	C	-	T
Yu796_NS	Flint Garcia et al. 300	T	G	G	A	C	C	C	C	-	T
A682	Flint Garcia et al. 300	T	G	G	A	C	C	C	C	-	T
Va102	Flint Garcia et al. 300	T	G	G	A	C	C	C	C	-	T
W64A	Flint Garcia et al. 300	T	G	G	A	C	C	C	C	-	T
CH701-30	Flint Garcia et al. 300	T	G	G	A	C	C	C	C	-	T
N192	Flint Garcia et al. 300	T	G	G	A	C	C	C	C	-	T
4226	Flint Garcia et al. 300	T	A	A	G	C	C	T	C	-	C
NC262	Flint Garcia et al. 300	T	A	G	T	T	C	C	C	-	C
H95	Flint Garcia et al. 300	T	A	A	G	C	C	T	C	-	C
IDS91	Flint Garcia et al. 300	T	A	A	G	C	C	T	C	-	C
CML 220	Flint Garcia et al. 300	T	A	G	T	C	C	C	C	-	C
NC364	Flint Garcia et al. 300	T	G	G	A	C	C	C	C	-	T
B57	Flint Garcia et al. 300	C	A	G	T	C	C	C	C	-	T
B103	Flint Garcia et al. 300	T	G	G	A	C	C	C	C	-	T
Oh43	Flint Garcia et al. 300	T	A	A	G	C	C	T	C	-	C
HP301	Flint Garcia et al. 300	T	G	G	A	C	C	C	C	-	T
Va17	Flint Garcia et al. 300	T	G	G	A	C	C	C	C	-	T
IDS28	Flint Garcia et al. 300	T	G	G	A	C	C	C	C	-	T
NC358	Flint Garcia et al. 300	T	G	G	A	C	C	C	C	-	T
M14	Flint Garcia et al. 300	T	G	G	A	C	C	C	C	-	T
Mo46	Flint Garcia et al. 300	T	G	G	A	C	C	C	C	-	T
A632	Flint Garcia et al. 300	T	G	G	A	C	C	C	C	-	T
B75	Flint Garcia et al. 300	T	G	G	A	C	C	C	C	-	T
Va99	Flint Garcia et al. 300	T	G	G	A	C	C	C	C	-	T
N28Ht	Flint Garcia et al. 300	T	G	G	A	C	C	C	C	-	T
R177	Flint Garcia et al. 300	T	G	G	A	C	C	C	C	-	T
B73Htrhm	Flint Garcia et al. 300	T	G	G	A	C	C	C	C	-	T
K148	Flint Garcia et al. 300	T	A	A	G	C	C	T	C	-	C
Oh43E	Flint Garcia et al. 300	T	A	A	G	C	C	T	C	-	C
N7A Goodman-Buckler	Flint Garcia et al. 300	T	G	G	A	C	C	C	C	-	T
Mo1W	Flint Garcia et al. 300	T	G	G	A	C	C	C	C	-	T
H105W	Flint Garcia et al. 300	T	G	G	A	C	C	C	C	-	T
B2	Flint Garcia et al. 300	T	G	G	A	C	C	C	C	-	T
33-16	Flint Garcia et al. 300	T	A	G	T	T	C	C	C	-	C
Va85	Flint Garcia et al. 300	T	G	G	A	C	C	C	C	-	T
A659	Flint Garcia et al. 300	T	A	G	T	T	C	C	C	-	C
H84	Flint Garcia et al. 300	T	G	G	A	C	C	C	C	-	T
IA5125	Flint Garcia et al. 300	T	G	G	A	C	C	C	C	-	T
Va35	Flint Garcia et al. 300	T	G	G	A	C	C	C	C	-	T
H49	Flint Garcia et al. 300	T	A	G	T	C	C	C	C	-	C
NC290A	Flint Garcia et al. 300	T	A	G	T	T	C	C	C	-	C
NC292	Flint Garcia et al. 300	T	G	G	A	C	C	C	C	-	T
NC314	Flint Garcia et al. 300	T	G	G	A	C	C	C	C	-	T
SG 18	Flint Garcia et al. 300	T	G	G	A	C	C	C	C	-	T
B76	Flint Garcia et al. 300	T	G	G	A	C	C	C	C	-	T
Sg 1533	Flint Garcia et al. 300	T	G	G	A	C	C	C	C	-	T
Va26	Flint Garcia et al. 300	T	A	A	G	C	C	T	C	-	C
CI 187-2	Flint Garcia et al. 300	T	G	G	A	C	C	C	C	-	T
Ill.Hy	Flint Garcia et al. 300	T	G	G	A	C	C	C	C	-	T
NC330	Flint Garcia et al. 300	T	G	G	A	C	C	C	C	-	T
NC362	Flint Garcia et al. 300	T	A	G	T	T	C	C	C	-	C
R109B	Flint Garcia et al. 300	T	G	G	A	C	C	C	C	-	T
Mo17	Flint Garcia et al. 300	T	G	G	A	C	C	C	C	-	T
Mo45	Flint Garcia et al. 300	T	G	G	A	C	C	C	C	-	T
R229	Flint Garcia et al. 300	T	G	G	A	C	C	C	C	-	T
IDS69	Flint Garcia et al. 300	T	G	G	A	C	C	C	C	-	T
Il677a	Flint Garcia et al. 300	T	G	G	A	C	C	C	C	-	T
Mo.G	Flint Garcia et al. 300	T	G	G	A	C	C	C	C	-	T
NC310	Flint Garcia et al. 300	T	G	G	A	C	C	C	C	-	T
NC326	Flint Garcia et al. 300	T	G	G	A	C	C	C	C	-	T
NC328	Flint Garcia et al. 300	T	G	G	A	C	C	C	C	-	T
I 205	Flint Garcia et al. 300	T	G	G	A	C	C	C	C	-	T
SD40	Flint Garcia et al. 300	T	G	G	A	C	C	C	C	-	T
CI90C	Flint Garcia et al. 300	T	G	G	A	C	C	C	C	-	T
NC316	Flint Garcia et al. 300	T	G	G	A	C	C	C	C	-	T
NC324	Flint Garcia et al. 300	T	G	G	A	C	C	C	C	-	T
NC356	Flint Garcia et al. 300	T	G	G	A	C	C	C	C	-	T
Pa762	Flint Garcia et al. 300	T	A	A	G	C	C	T	C	-	C
Pa875	Flint Garcia et al. 300	T	G	G	A	C	C	C	C	-	T
Pa880	Flint Garcia et al. 300	T	G	G	A	C	C	C	C	-	T
B46	Flint Garcia et al. 300	T	G	G	A	C	C	C	C	-	T
B79	Flint Garcia et al. 300	T	G	G	A	C	C	C	C	-	T
E2558W	Flint Garcia et al. 300	T	G	G	A	C	C	C	C	-	T
NC372	Flint Garcia et al. 300	T	G	G	A	C	C	C	C	-	T
L317	Flint Garcia et al. 300	T	G	G	A	C	C	C	C	-	T
NC250	Flint Garcia et al. 300	T	G	G	A	C	C	C	C	-	T
Oh603	Flint Garcia et al. 300	T	A	G	T	T	C	C	C	-	C
B104	Flint Garcia et al. 300	T	G	G	A	C	C	C	C	-	T
B105	Flint Garcia et al. 300	T	G	G	A	C	C	C	C	-	T
B84	Flint Garcia et al. 300	T	G	G	A	C	C	C	C	-	T
CML 103	Flint Garcia et al. 300	T	G	G	A	C	C	C	C	-	T
CML 154Q	Flint Garcia et al. 300	T	G	G	A	C	C	C	C	-	T
I137TN	Flint Garcia et al. 300	C	A	G	T	C	C	C	C	-	T
R4	Flint Garcia et al. 300	T	G	G	A	C	C	C	C	-	T
B37	Flint Garcia et al. 300	T	G	G	A	C	C	C	C	-	T
DE1	Flint Garcia et al. 300	T	G	G	A	C	C	C	C	-	T
B77	Flint Garcia et al. 300	T	G	G	A	C	C	C	C	-	C
Ky226	Flint Garcia et al. 300	T	G	G	A	C	C	C	C	-	T
NC342	Flint Garcia et al. 300	T	G	G	A	C	C	C	C	-	T
NC354	Flint Garcia et al. 300	T	G	G	A	C	C	C	C	-	T
Oh40B	Flint Garcia et al. 300	T	G	G	A	C	C	C	C	-	T
K4	Flint Garcia et al. 300	T	G	G	A	C	C	C	C	-	T
DE811	Flint Garcia et al. 300	T	G	G	A	C	C	C	C	-	T
4722	Flint Garcia et al. 300	T	G	G	A	C	C	C	C	-	T
NC340	Flint Garcia et al. 300	T	G	G	A	C	C	C	C	-	T
B68	Flint Garcia et al. 300	T	G	G	A	C	C	C	C	-	T
T232	Flint Garcia et al. 300	T	G	G	A	C	C	C	C	-	T
NC236	Flint Garcia et al. 300	T	G	G	A	C	C	C	C	-	T
A441-5	Flint Garcia et al. 300	T	G	G	A	C	C	C	C	-	T
CML 92	Flint Garcia et al. 300	T	G	G	A	C	C	C	C	-	T
NC306	Flint Garcia et al. 300	T	G	G	A	C	C	C	C	-	T
NC320	Flint Garcia et al. 300	T	G	G	A	C	C	C	C	-	T
NC322	Flint Garcia et al. 300	T	A	G	T	T	C	C	C	-	C
NC368	Flint Garcia et al. 300	T	G	G	A	C	C	C	C	-	T
SA24	Flint Garcia et al. 300	T	G	G	A	C	C	C	C	-	T
CI 7 Goodman-Buckler	Flint Garcia et al. 300	T	A	G	T	T	C	C	C	-	C
NC264	Flint Garcia et al. 300	T	A	G	T	T	C	C	C	-	C
T8	Flint Garcia et al. 300	T	G	G	A	C	C	C	C	-	T
Pa91	Flint Garcia et al. 300	T	G	G	A	C	C	C	C	-	T
CI64	Flint Garcia et al. 300	T	G	G	A	C	C	C	C	-	T
Tx303	Flint Garcia et al. 300	T	A	G	T	C	C	C	C	-	C
CI31A	Flint Garcia et al. 300	C	A	G	T	C	C	C	C	-	T
CML 218	Flint Garcia et al. 300	T	G	G	A	C	C	C	C	-	T
CML 314	Flint Garcia et al. 300	T	G	G	A	C	C	C	C	-	T
Ki3	Flint Garcia et al. 300	T	G	G	A	C	C	C	C	-	T
NC304	Flint Garcia et al. 300	T	G	G	A	C	C	C	C	-	T
NC312	Flint Garcia et al. 300	T	G	G	A	C	C	C	C	-	T
CI 21E	Flint Garcia et al. 300	T	G	G	A	C	C	C	C	-	T
CI 28A	Flint Garcia et al. 300	T	G	G	A	C	C	C	C	-	T
B96	Flint Garcia et al. 300	T	G	G	A	C	C	C	C	-	T
Tzi 9	Flint Garcia et al. 300	T	G	G	A	C	C	C	G	-	C
CML 108	Flint Garcia et al. 300	T	G	G	A	C	C	C	C	-	T
CML 333	Flint Garcia et al. 300	T	G	G	A	C	C	C	C	-	T
GT112	Flint Garcia et al. 300	T	G	G	A	C	C	C	C	-	T
Ki43	Flint Garcia et al. 300	T	A	A	G	C	C	T	C	-	C
M162W	Flint Garcia et al. 300	T	G	G	A	C	C	C	C	-	T
NC258	Flint Garcia et al. 300	T	G	G	A	C	C	C	C	-	T
Ky228	Flint Garcia et al. 300	T	A	G	T	T	C	C	C	-	C
NC268	Flint Garcia et al. 300	T	G	G	A	C	C	C	C	-	T
GA209	Flint Garcia et al. 300	T	G	G	A	C	C	C	C	-	C
Ky21	Flint Garcia et al. 300	T	G	G	A	C	C	C	C	-	C
L578	Flint Garcia et al. 300	T	G	G	A	C	C	C	C	-	T
NC332	Flint Garcia et al. 300	T	A	G	T	T	C	C	C	-	C
NC348	Flint Garcia et al. 300	T	G	G	A	C	C	C	C	-	T
NC298	Flint Garcia et al. 300	T	G	G	A	C	C	C	C	-	T
NC222	Flint Garcia et al. 300	T	A	G	T	T	C	C	C	-	C
Tx601	Flint Garcia et al. 300	T	G	G	A	C	C	C	C	-	T
38-11	Flint Garcia et al. 300	T	G	G	A	C	C	C	C	-	T
A6	Flint Garcia et al. 300	T	G	G	A	C	C	C	C	-	T
CML 332	Flint Garcia et al. 300	T	G	G	A	C	C	C	C	-	T
Ki21	Flint Garcia et al. 300	T	G	G	A	C	C	C	C	-	T
NC334	Flint Garcia et al. 300	T	A	G	T	T	C	C	C	-	C
Hi27 Goodman-Buckler	Flint Garcia et al. 300	T	G	G	A	C	C	C	C	-	T
B52	Flint Garcia et al. 300	T	G	G	A	C	C	C	C	-	T
81-1	Flint Garcia et al. 300	T	G	G	A	C	C	C	C	-	T
F44	Flint Garcia et al. 300	T	G	G	A	C	C	C	C	-	T
CML 228	Flint Garcia et al. 300	C	A	G	T	C	C	C	C	-	T
CML 238	Flint Garcia et al. 300	T	G	G	A	C	C	C	C	-	T
CML 323	Flint Garcia et al. 300	T	G	G	A	C	C	C	C	-	T
KUI2021	Flint Garcia et al. 300	T	G	G	A	C	C	C	C	-	T
NC338	Flint Garcia et al. 300	T	A	A	G	C	C	T	C	-	C
NC344	Flint Garcia et al. 300	T	G	G	A	C	C	C	C	-	T
NC360	Flint Garcia et al. 300	T	G	G	A	C	C	C	C	-	T
NC370	Flint Garcia et al. 300	T	A	G	T	T	C	C	C	-	C
Ki14	Flint Garcia et al. 300	T	G	G	A	C	C	C	C	-	T
CI 44	Flint Garcia et al. 300	T	G	G	A	C	C	C	C	-	T
F6	Flint Garcia et al. 300	T	G	G	A	C	C	C	C	-	T
A214N	Flint Garcia et al. 300	T	G	G	A	C	C	C	C	-	T
Tzi 18	Flint Garcia et al. 300	T	G	G	A	C	C	C	C	+	T
Tzi 16	Flint Garcia et al. 300	T	G	G	A	C	C	C	C	-	T
Mp339	Flint Garcia et al. 300	T	A	G	T	T	C	C	C	-	C
B64	Flint Garcia et al. 300	T	G	G	A	C	C	C	C	-	T
NC238	Flint Garcia et al. 300	T	G	G	A	C	C	C	C	-	T
CML 157Q	Flint Garcia et al. 300	T	G	G	A	C	C	C	C	-	T
CML 11	Flint Garcia et al. 300	T	G	G	A	C	C	C	C	-	T
KUI2007	Flint Garcia et al. 300	T	G	G	A	C	C	C	C	-	T
NC33	Flint Garcia et al. 300	T	G	G	A	C	C	C	C	-	T
Ab28A	Flint Garcia et al. 300	T	G	G	A	C	C	C	C	-	T
CML 158Q	Flint Garcia et al. 300	T	G	G	A	C	C	C	C	-	T
CML 311	Flint Garcia et al. 300	T	G	G	A	C	C	C	C	-	T
CML 341	Flint Garcia et al. 300	T	G	G	A	C	C	C	C	-	T
Ki11	Flint Garcia et al. 300	T	G	G	A	C	C	C	C	-	T
SC55	Flint Garcia et al. 300	T	G	G	A	C	C	C	C	-	T
CI66	Flint Garcia et al. 300	T	A	A	G	C	C	T	C	-	C
Tzi 8	Flint Garcia et al. 300	T	G	G	A	C	C	C	C	-	T
CML 69	Flint Garcia et al. 300	T	G	G	A	C	T	C	C	+	T
Tzi 10	Flint Garcia et al. 300	T	G	G	A	C	C	C	C	-	T
Mo18W	Flint Garcia et al. 300	T	G	G	A	C	C	C	C	-	T
CML 10	Flint Garcia et al. 300	T	G	G	A	C	C	C	C	-	T
U267Y	Flint Garcia et al. 300	T	G	G	A	C	C	C	C	-	T
KUI44	Flint Garcia et al. 300	T	G	G	A	C	C	C	C	-	T
SC 213R	Flint Garcia et al. 300	T	G	G	A	C	C	C	C	-	T
CML 38	Flint Garcia et al. 300	T	G	G	A	C	C	C	G	-	C
CML 52	Flint Garcia et al. 300	T	A	G	W	Y	C	C	C	-	T
CML 321	Flint Garcia et al. 300	T	G	G	A	C	C	C	C	-	C
CML 331	Flint Garcia et al. 300	T	R	G	W	T	C	C	C	-	T
CML 45	Flint Garcia et al. 300	T	G	G	A	C	C	C	C	-	T
CML 9	Flint Garcia et al. 300	T	G	G	A	C	C	C	C	-	T
CML 281	Flint Garcia et al. 300	T	G	G	A	C	C	C	C	-	T
CML 61	Flint Garcia et al. 300	T	G	G	A	C	C	C	G	-	C
CML 264	Flint Garcia et al. 300	T	G	G	A	C	C	C	C	-	T
S2B73	Flint Garcia et al. 300	T	R	G	W	Y	C	C	C	-	T
GT-AT823	Southern Adapted 100	T	A	G	T	Y	C	Y	C	-	C
GT 601	southern Adapted 100	T	R	G	W	Y	C	C	C	-	T
GT-AT819	Southern Adapted 100	T	G	G	A	C	C	C	C	-	T
C2A554-4	Southern Adapted 100	T	A	G	T	T	C	C	C	-	T
Tx772	Southern Adapted 100	T	G	G	A	C	C	C	C	-	T
[Cuba/Guad C3 F44-1-3-2-B-B-B x CML 486]-1-1	Southern Adapted 100	T	R	G	A	C	C	C	C	-	T
Mp 712	Southern Adapted 100	T	R	G	A	C	C	C	C	-	T
Syn-Ham-22-81	Southern Adapted 100	T	G	G	A	C	C	C	C	-	T
Tx205	Southern Adapted 100	T	G	G	A	C	C	C	C	-	T
[M37W/ZM607#bF37sr-2-3sr-6-2-X]-8-2-X-1-BB-B-xP84c1 F27-4-3-3-B-1-B] F29-1-1-1-7 x [KILIMA ST94A]-30/MSV-03-2-10-B-1-B-B-xP84c1 F27-4-1-6-B-5-B]-1-3-B/CML312SR]-1-1	Southern Adapted 100	T	R	G	W	C	C	C	C	-	T
DTPYC9-F143-5-4-1-2-B	Southern Adapted 100	T	A	G	T	C	C	C	C	-	T
((B104/NC300)X(CML415/B104))-4-2-B-B	Southern Adapted 100	T	G	G	A	C	C	C	C	-	T
GT 602	Southern Adapted 100	T	G	G	G	C	C	C	C	-	T
GT-A2	Southern Adapted 100	T	G	G	A	C	C	C	C	-	T
[MBR C6 Bc G395-1-B-#-2-2-B-B-B-B-B/CML312SR]-1-1	Southern Adapted 100	T	A	A	G	C	C	C	C	-	T
Mp 07:153	Southern Adapted 100	T	G	G	A	C	C	C	C	-	T
Mp 714	Southern Adapted 100	T	G	G	A	C	C	C	C	-	T
GT-AT 709	Southern Adapted 100	T	R	R	R	C	C	Y	C	-	T
Mp 705	Southern Adapted 100	T	R	G	R	C	C	C	C	-	T
A&M Y07-221	Southern Adapted 100	T	R	R	W	C	C	C	C	-	T
CML 432	Southern Adapted 100	Y	R	G	W	C	C	C	C	-	T
Mp 709	Southern Adapted 100	T	G	G	A	C	C	C	C	-	T
SC 212M	Southern Adapted 100	T	R	G	W	Y	C	C	C	-	C
La Posta Seq C7-F123-3-1-1-2-B-B-B	Southern Adapted 100	T	A	A	G	C	C	C	C	-	T
Mp 420	Southern Adapted 100	T	R	G	W	C	C	C	C	-	T
CML 316	Southern Adapted 100	T	G	G	A	C	C	C	C	-	T
SC 29	Southern Adapted 100	T	R	G	W	Y	C	C	C	-	C
A&M Y07-226	Southern Adapted 100	T	R	R	G	C	C	Y	C	-	C
A&M Y07-219	Southern Adapted 100	Y	R	G	W	C	C	C	C	-	T
A&M Y07-222	Southern Adapted 100	T	G	G	R	C	C	C	C	-	T
CML-322 Recy W89[L/LMBR]17-B-5-3-1-4-B*4xMBR-ET(W) C1 F139-2-1-B-2-B*7-1-B -B	Southern Adapted 100	T	G	G	A	C	C	C	C	-	T
La Posta Seq C7-F71-1-2-1-1-B-B-B	Southern Adapted 100	T	G	G	A	C	C	C	C	-	T
La Posta Seq C7-F71-1-2-1-2-B-B-B	Southern Adapted 100	T	G	G	A	C	C	C	C	-	T
DTPYC9-F134-3-1-B	Southern Adapted 100	T	A	A	R	C	C	Y	C	-	T
P84c3Bc X P390Bco/CMLc4F92-B-2-1-2-1-B-B	Southern Adapted 100	T	R	R	R	C	C	Y	C	-	T
LAMA 2002-10-1-B	Southern Adapted 100	T	R	G	A	Y	C	C	C	-	T
CML 479	Southern Adapted 100	T	G	G	A	C	C	C	C	-	T
P84c 3BC C Mirt C5 BC0 F80-4-2-1-4-1-1-B-B	Southern Adapted 100	T	G	G	A	C	C	C	C	-	T
CML 376	Southern Adapted 100	T	G	G	A	C	C	C	C	-	T
GT-CY-2	Southern Adapted 100	T	G	G	A	C	C	C	C	-	T
SC 76	Southern Adapted 100	T	A	G	T	T	C	C	C	-	C
[Cuba/Guad C3 F34-2-1-1-B-B-B x CML264Q]-1-1	Southern Adapted 100	T	G	G	A	C	C	C	C	-	T
